# Supplementary material
Source: Springer Nature journal article supplement (https://www.springermedizin.de/resource/supplementary/13601_2014_1060_MOESM2_ESM.pdf/9678610)

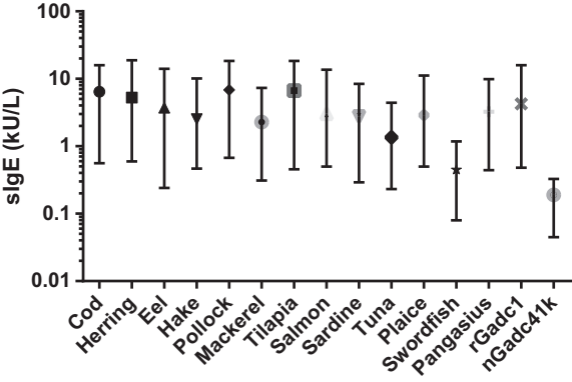

Supplement: MOESM2 [file 9678610]
